# Supplementary material for: Ethanol Enhances Hyperthermia-Induced Cell Death in Human Leukemia Cells
Source: MDPI journal article supplement (doi:10.3390/ijms22094948), 2021-05-06

## Supplementary Materials

**Figure S1: Autophagy is not involved in the enhancement of hyperthermia-induced apoptotic cell death by ethanol.**

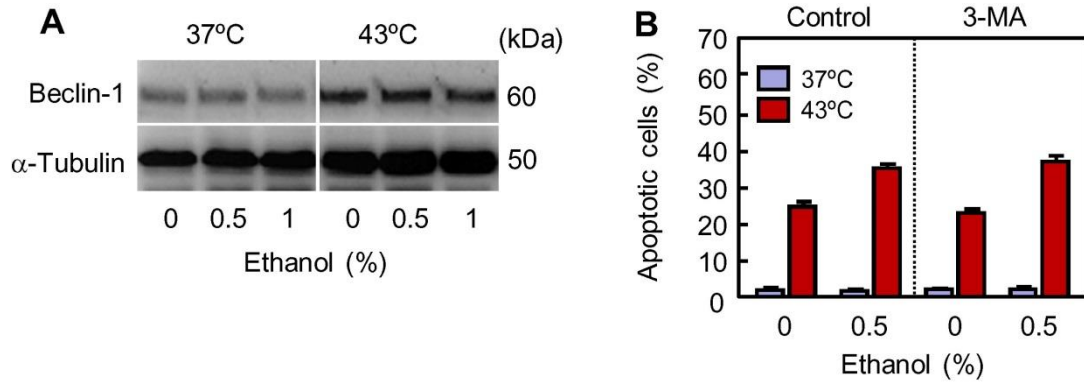

**Figure S1.** Autophagy is not involved in the enhancement of hyperthermia-induced apoptotic cell death by ethanol. U937 cells were pre-incubated with 3-methyladenine (3-MA, 5 mM) for 2 hr. The cells were then cultured in absence or presence of ethanol, exposed to hyperthermia (30 min at 43 °C) and allowed to recover for 3 h. (A) Whole cell lysates were prepared and assayed by immunoblotting; as a loading control,  $\alpha$ -tubulin was also determined. (B) The percentage of apoptotic cells was determined by flow cytometry using the propidium iodide staining procedure.

## Supplementary Materials

**Figure S2: Ethanol does not stimulate reactive oxygen species generation in cells subjected to hyperthermia.**

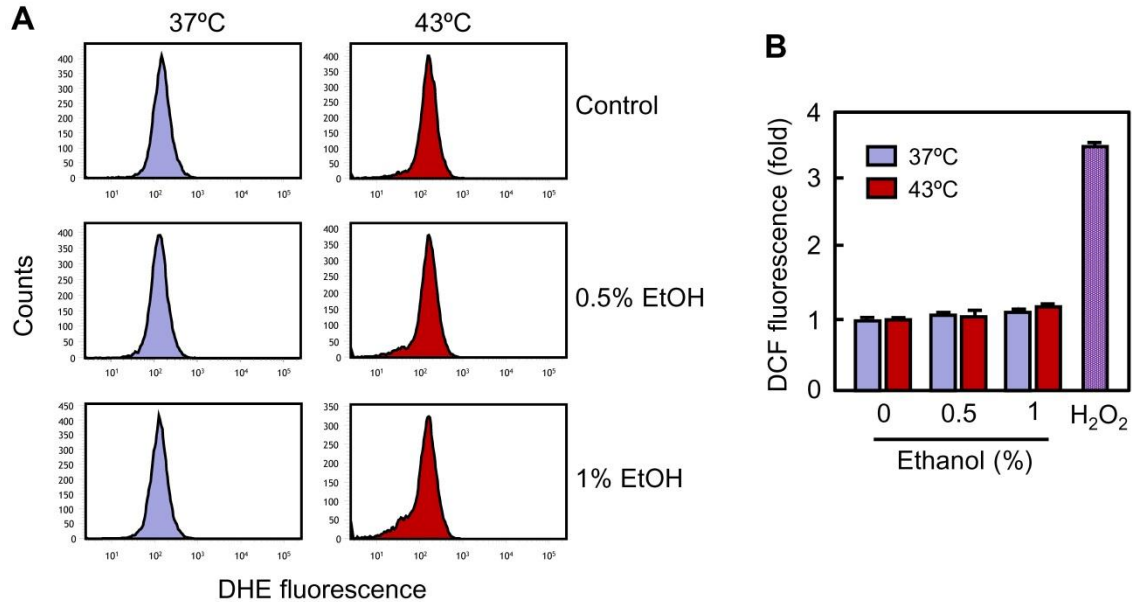

**Figure S2.** Ethanol does not stimulate reactive oxygen species generation in cells subjected to hyperthermia. U937 cells were pre-incubated in absence or presence of indicated concentrations of ethanol, exposed to hyperthermia (30 min at 43 °C) and allowed to recover for 1 h. (A) Fluorescence of oxidized DHE was determined by flow cytometry as described in Materials and Methods section; histograms from a representative experiment are shown. (B) Fluorescence of oxidized DCF was determined by flow cytometry; means fluorescence from the resulting histograms were determined and represented as fold increase in comparison with cells cultured at 37 °C in absence of ethanol. As a positive control, cells were treated with hydrogen peroxide (H<sub>2</sub>O<sub>2</sub>, 300 μM).

## Supplementary Materials

**Figure S3: Anti-oxidants do not block the enhancement of hyperthermia-induced apoptotic cell death by ethanol.**

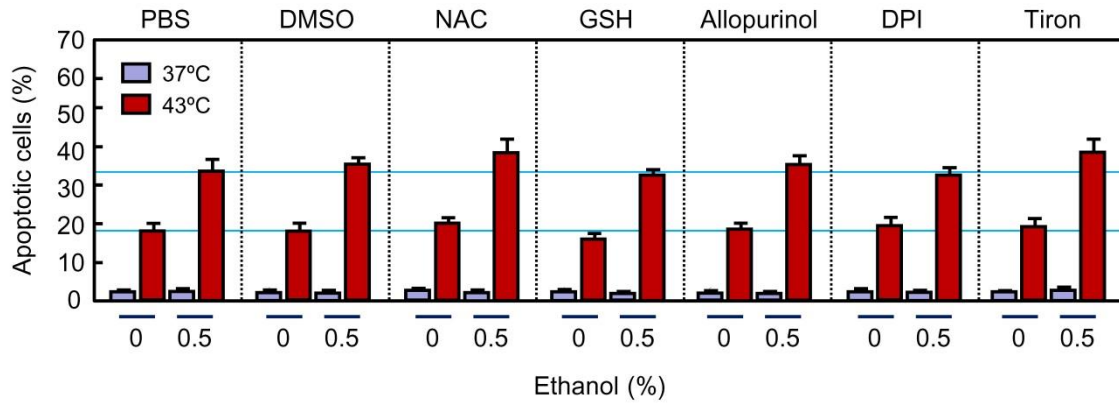

**Figure S3.** Anti-oxidants do not block the enhancement of hyperthermia-induced apoptotic cell death by ethanol. U937 cells were pre-incubated with *N*-acetyl-L-cysteine (NAC, 5 mM), L-glutathione (GSH, 1 mM), allopurinol (10  $\mu$ M), diphenyleneiodonium chloride (DPI, 20  $\mu$ M) or tiron (20  $\mu$ M) for 2 hr. The cells were then cultured in absence or presence of ethanol, exposed to hyperthermia (30 min at 43 °C) and allowed to recover for 3 h. The percentage of apoptotic cells was determined by flow cytometry using the propidium iodide staining procedure.

## Supplementary Materials

### Whole Western blots for Figure 4

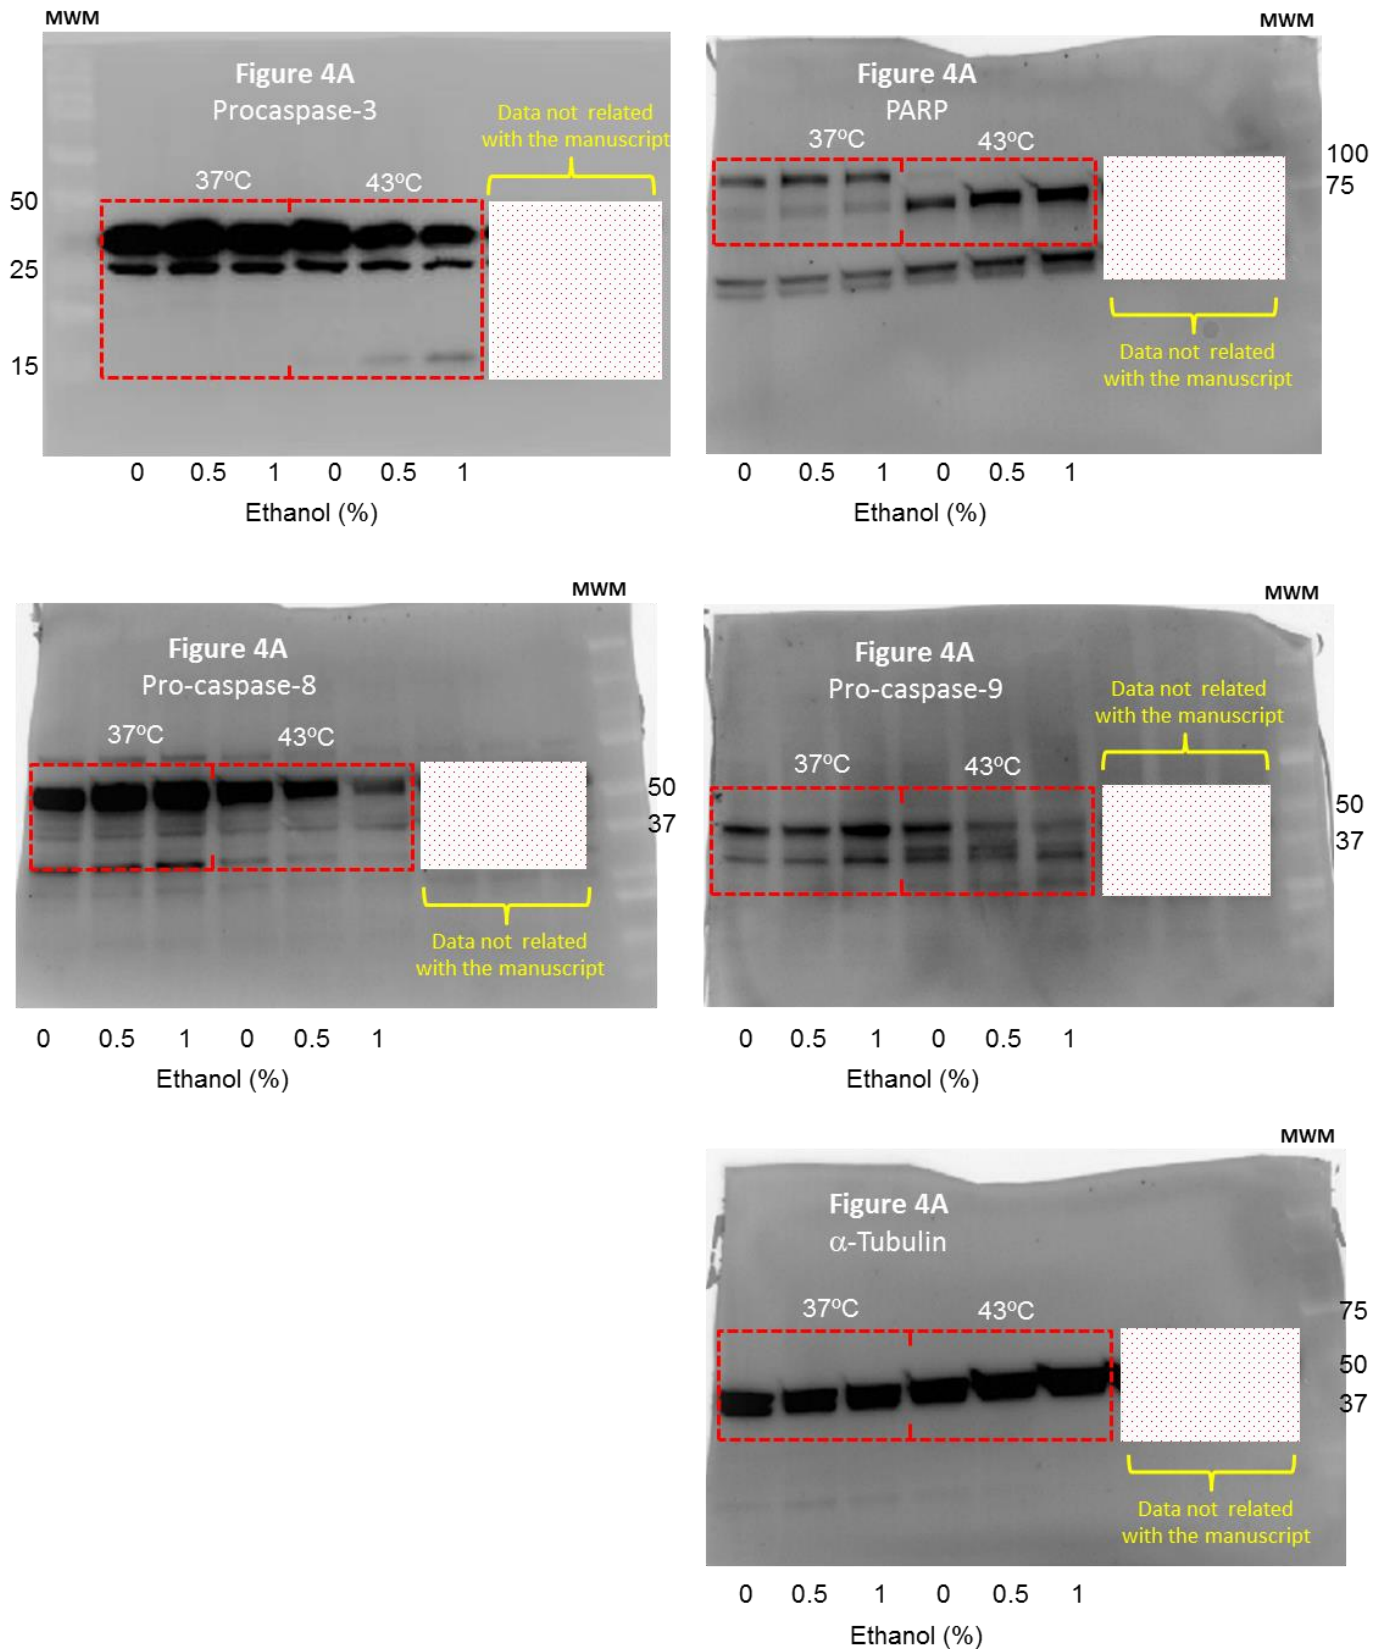

## Supplementary Materials

### Whole Western blots for Figure 5

#### Whole blot with molecular weight markers

#### Figure 5A

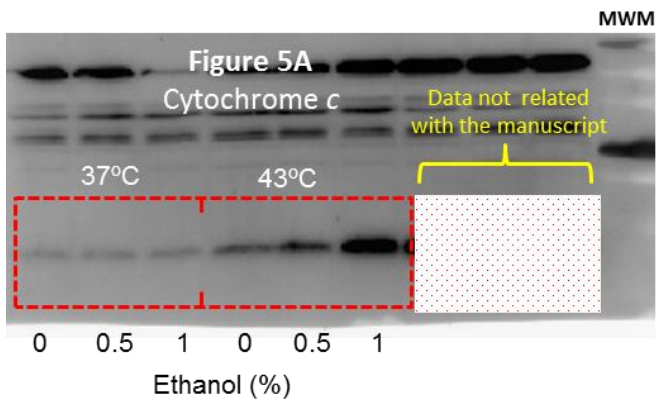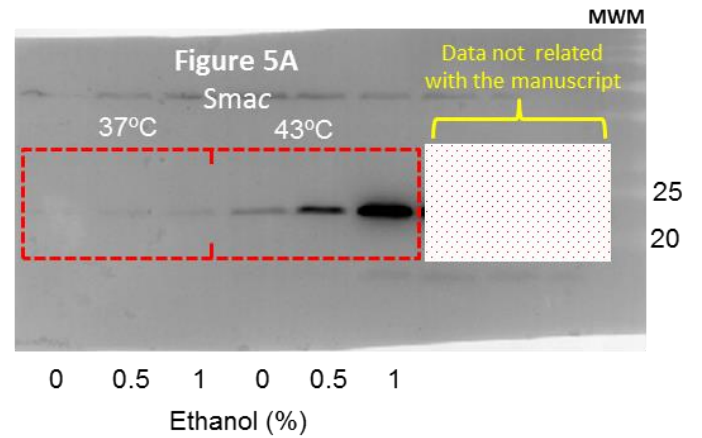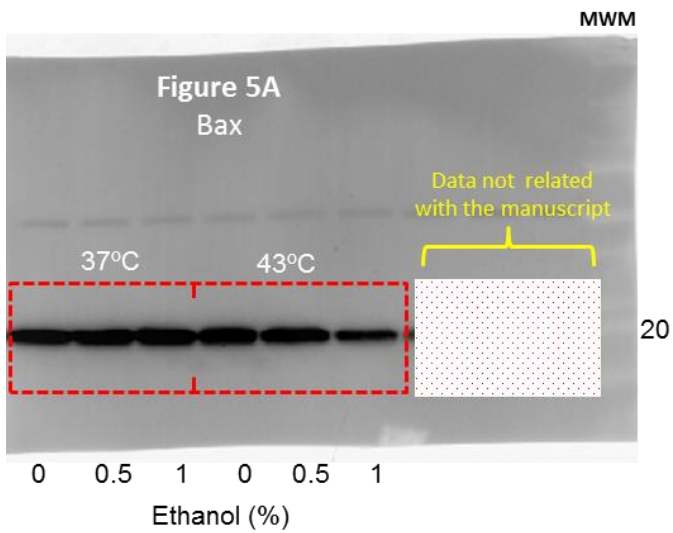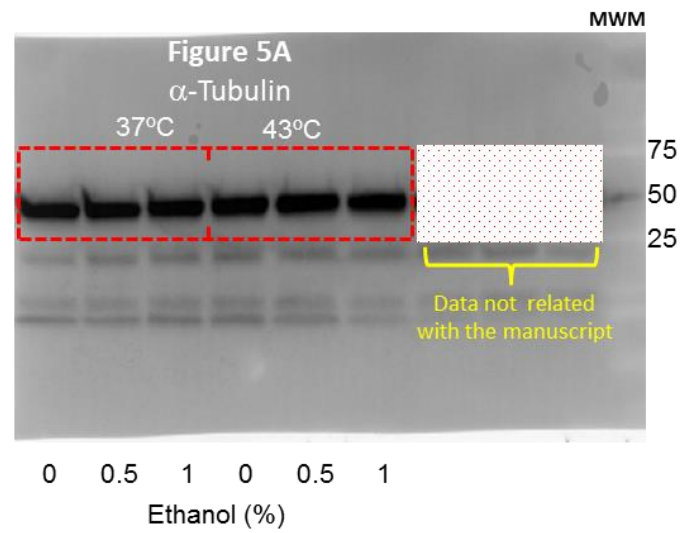

## Supplementary Materials

### Whole Western blots for Figure 5

#### Whole blot with molecular weight markers

Figure 5C

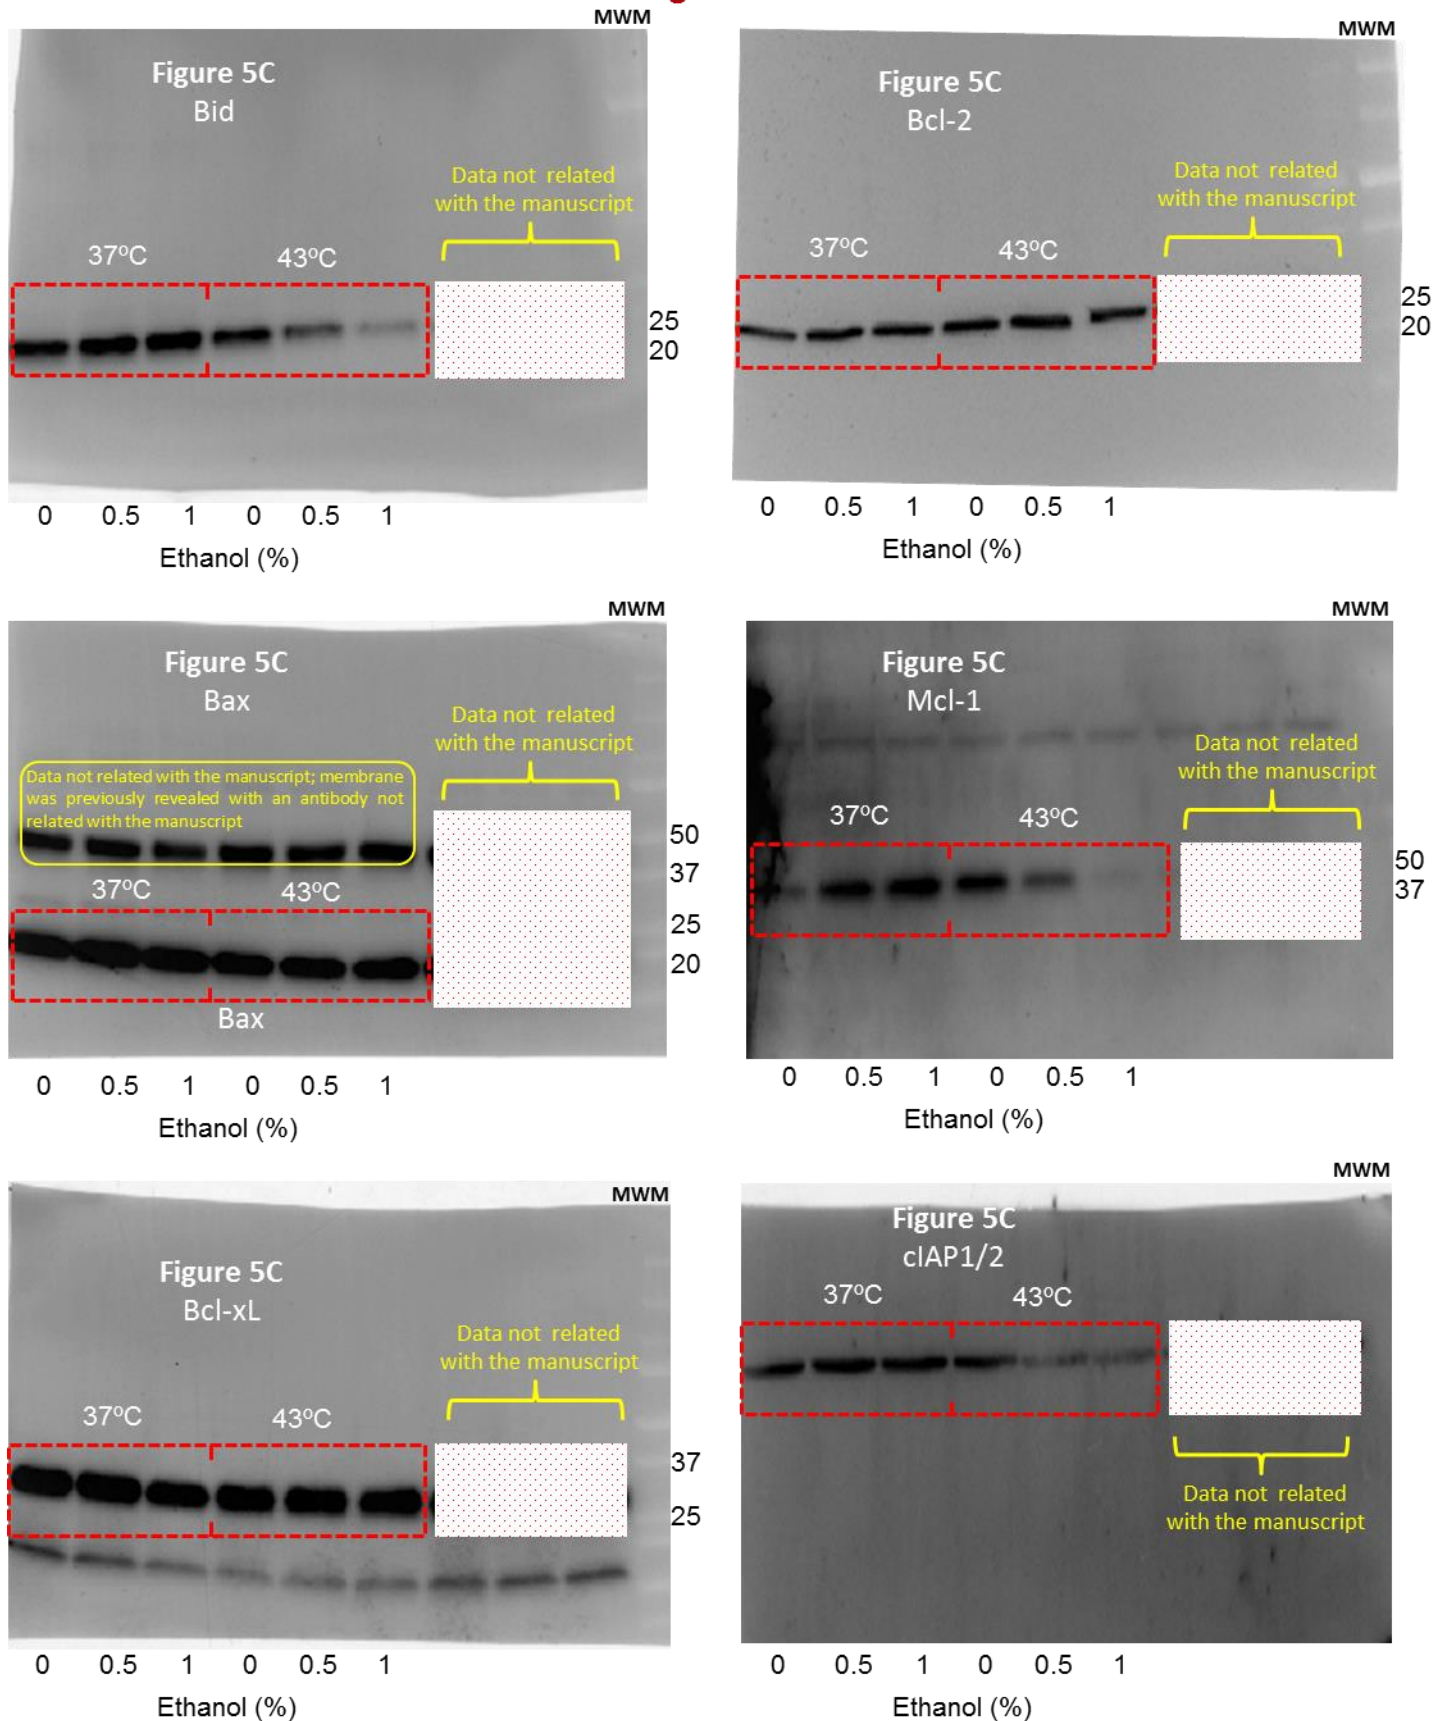



## Supplementary Materials

### Whole Western blots for Figure 5

#### Whole blot with molecular weight markers

#### Figure 5C

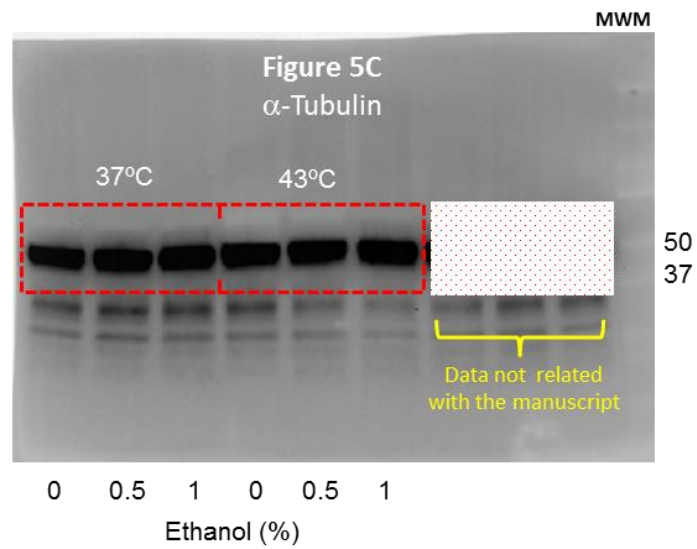

## Supplementary Materials

### Whole Western blots for Figure 6

#### Whole blot with molecular weight markers

#### Figure 6C

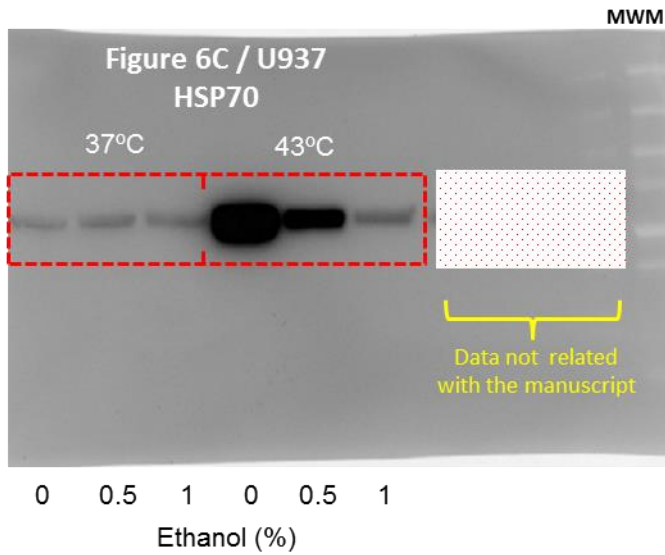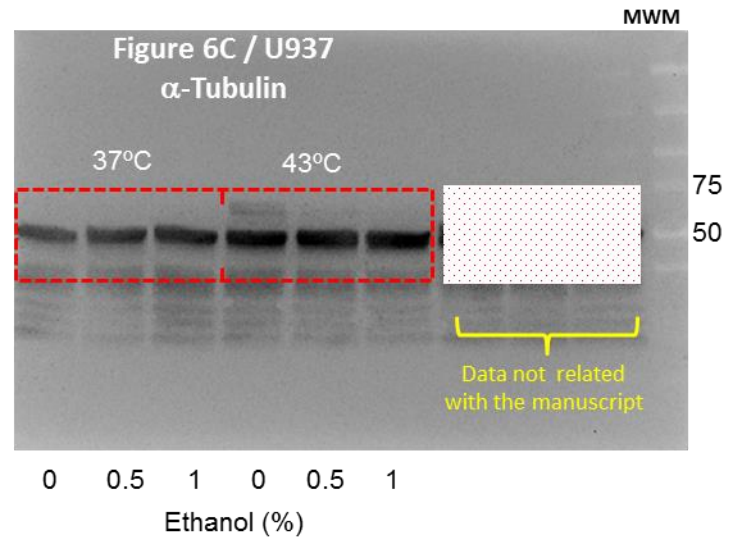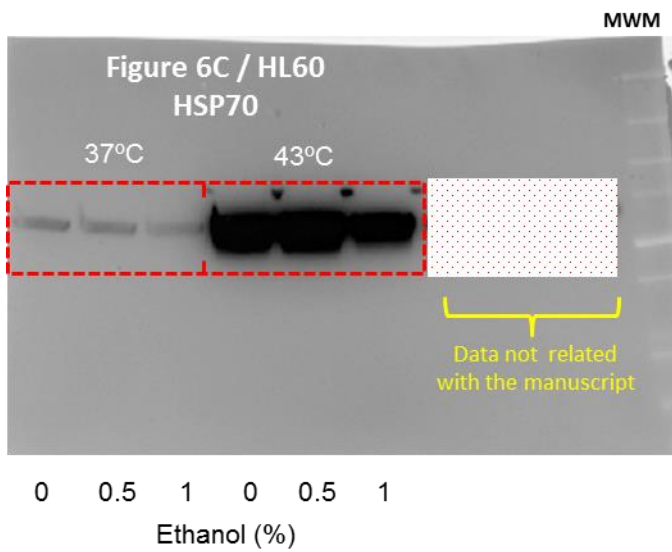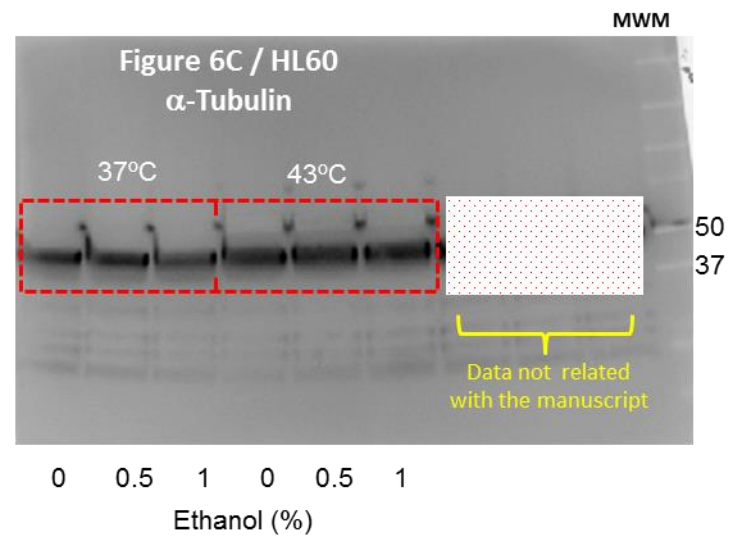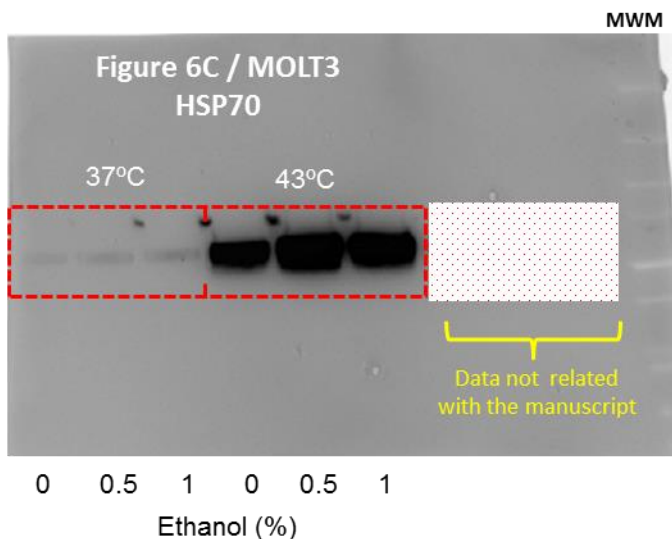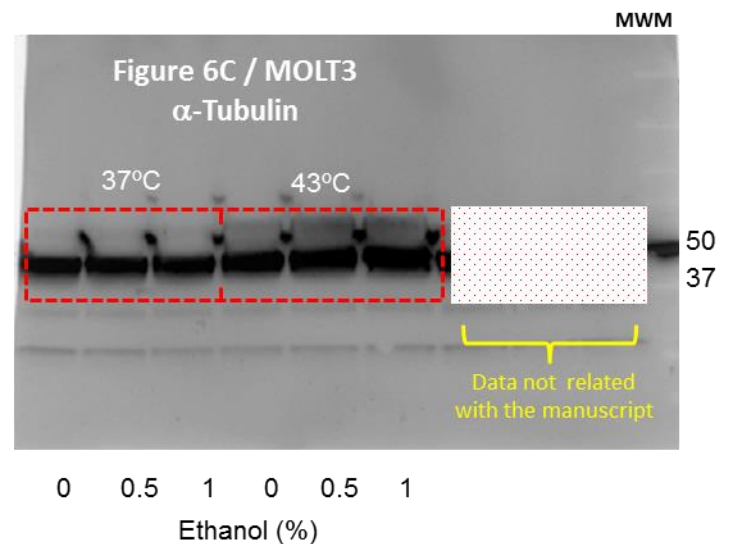



## Supplementary Materials

### Whole Western blots for Figure 6

#### Whole blot with molecular weight markers

#### Figure 6E

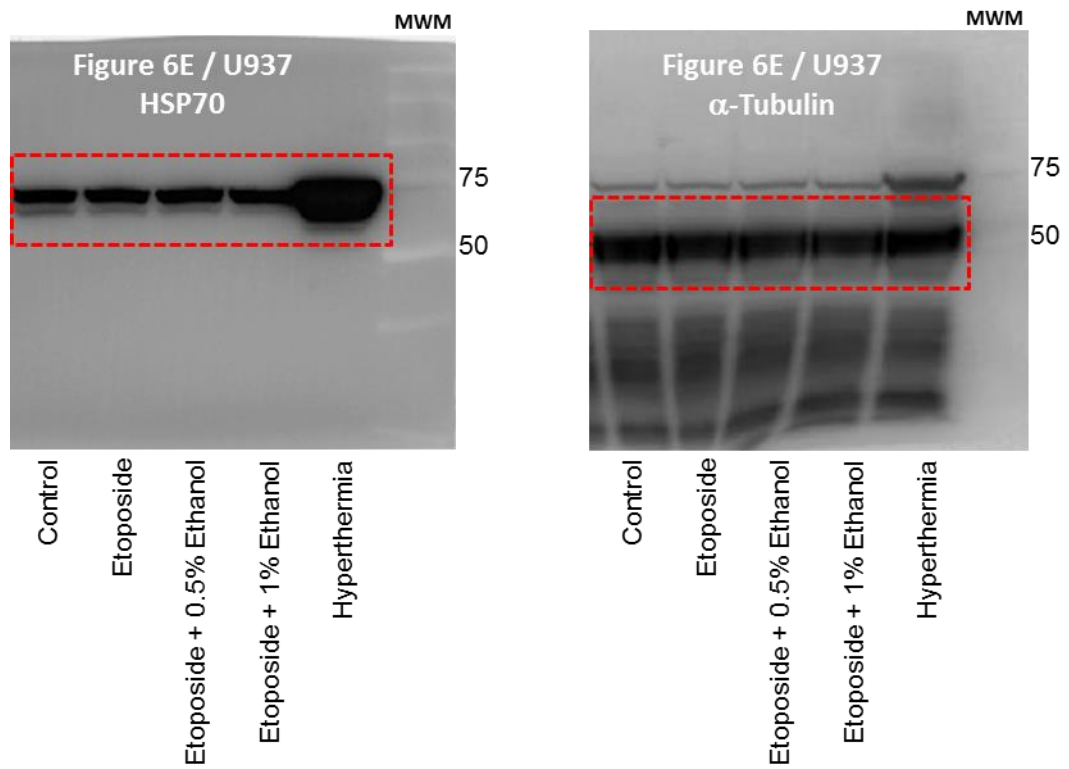

Supplement: s1 [file s1]
